# Supplementary material for: Cost‐Effectiveness of Left Atrial Appendage Closure for Stroke Reduction in Atrial Fibrillation: Analysis of Pooled, 5‐Year, Long‐Term Data
Source: PubMed Central journal article supplement — J Am Heart Assoc. 2019 Jun 22;8(13):e011577. doi: 10.1161/JAHA.118.011577 (PMC6662368; doi:10.1161/jaha.118.011577), 2019-06-22
Supplement: JAH3-8-e011577-s001.pdf [file JAH3-8-e011577-s001.pdf]

# **SUPPLEMENTAL MATERIAL**

**Data S1.**

## **Supplemental Results**

### **One-way Sensitivity Analysis**

LAAC vs. warfarin: Other variables that had a greater than 4% impact on model outcomes were the cost of the LAAC procedure, the percent of ischemic strokes experienced by LAAC patients that were non-disabling, and the long-term disability costs associated with severe strokes.

**Figure S1. Tornado plots of one-way sensitivity analyses at 20 years of LAAC versus warfarin and LAAC versus NOACs.**

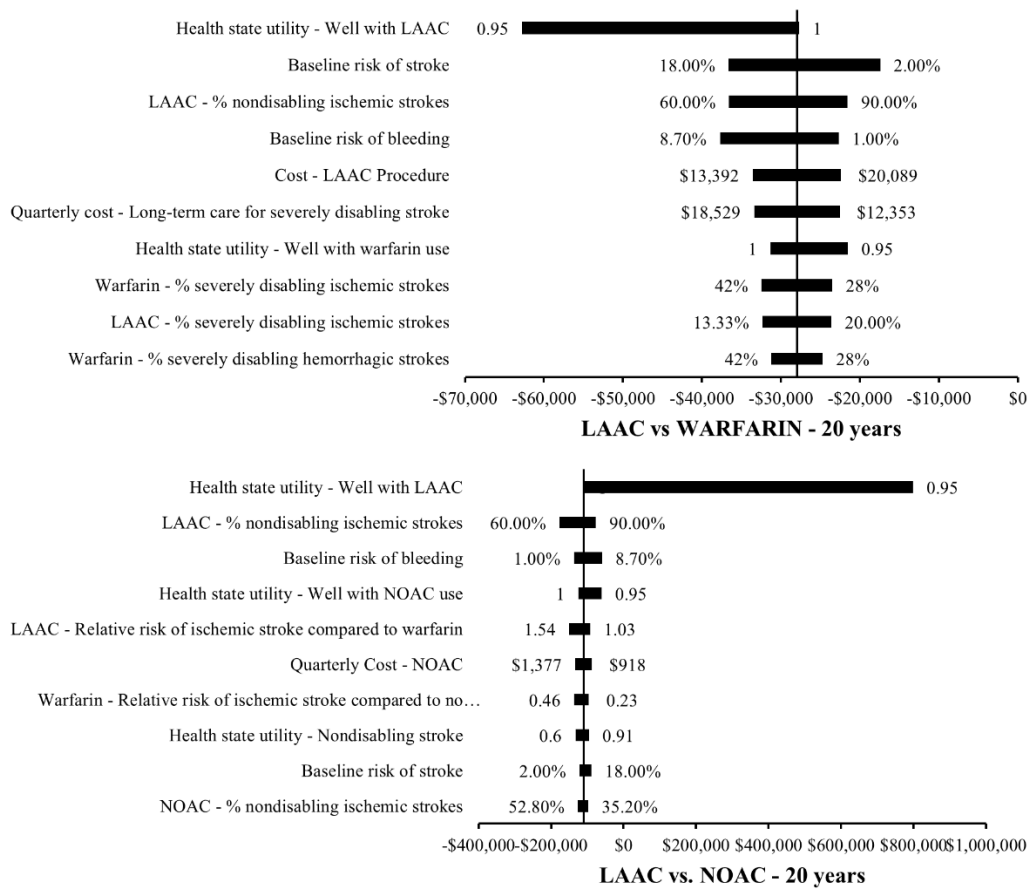

The ten most impactful variables are presented in descending order of influence. All were varied as published 95% confidence intervals or +/- 20%. LAAC=left atrial appendage closure; NOAC=non-warfarin oral anticoagulant.
